# Supplementary material
Source: publisher figshare collection journal article supplement (https://tandf.figshare.com/ndownloader/files/22075002)
Supplement: Supplementary file 1 [file 22075002]

Supplementary material to

**The Lean and Agile Multi-dimensional Process (LAMP) – a new framework for rapid and iterative evidence generation to support healthcare technology design and development**

**Evaluators form for project uptake**

1. Benefit/Risk assessment of technology

| Project ID | Date |
| --- | --- |

1. What is the proprietary value of the technology?
2. What are the unmet needs the technology is designed for?
3. Who are the competitors? What is their position in the market?
   - *Incumbent? new entrant? Other (please specify)*
4. What is the unique selling point of the technology?
5. What is the data that have currently been generated? Location? Sample size?
6. Who are the clinicians that the company has already engaged in and have committed to investigating the technology?
7. What is company’s budget for this work?
8. What are the current constraints of the technology?

2. Internal needs and constraints

1. Do we have the capacity to undertake this project? (Consider time/Scheduling/Personnel/Conflict with other scheduled priorities)
2. Is the proposed time scale for completion of the project realistic?
3. Who leads on this?
4. Does the project have academic merit and potential? (e.g. for further research grants, publications)
5. Does it fit with our clinical themes and expertise?
6. Who will quality control this project?
7. Do we have a project management system that can cope with this project/client? (e.g. reporting, milestones, review points etc.)
8. Is it a "loss leader"?
9. Can we recover start-up costs?
10. Does it fit with other funding sources? Which ones?
11. Are we missing other opportunities by doing this project?

3. Benefit and risk balance

Assessor N ____

| 1  (worst) | 2 | 3 | 4 | 5  (neutral) | 6 | 7 | 8 | 9  (best) |
| --- | --- | --- | --- | --- | --- | --- | --- | --- |
